# Supplementary material for: Carbon nanotubes@metal–organic frameworks as Mn-based symmetrical supercapacitor electrodes for enhanced charge storage
Source: Royal Society of Chemistry journal article supplement (doi:10.1039/c5ra11597c), 2015-01-01
Supplement: c5ra11597c1.pdf [file c5ra11597c1.pdf]

Electronic Supplementary Material (ESI) for RSC Advances.

This journal is © The Royal Society of Chemistry 2015

## Supporting Information

### **Carbon nanotubes@metal-organic frameworks as Mn-based symmetrical supercapacitor electrodes for enhanced charge storage**

Yidong Zhang, Baoping Lin\*, Ying Sun, Xueqin Zhang, Hong Yang,

School of Chemistry and Chemical Engineering, Southeast University, Nanjing 211189, China

\*Corresponding author: Baoping Lin

Tel./fax: +86-25-52090616

*E-mail address:* lbp@seu.edu.cn

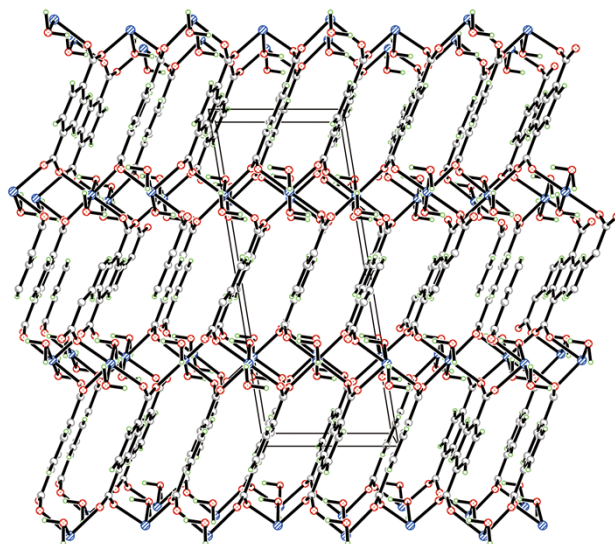

**Fig. S1** View of the structure of Mn-MOF along the b axis.

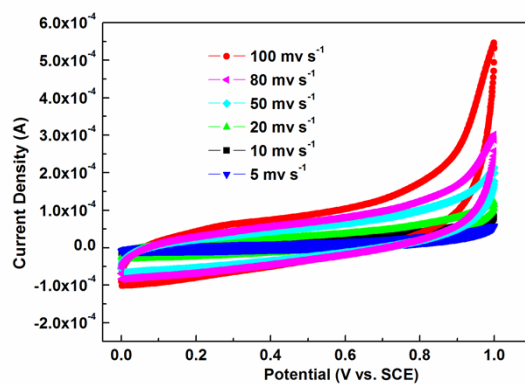

**Fig. S2** CV curves of blank carbon fiber paper tested by a three-electrode system at different scan rates in 1 M Na<sub>2</sub>SO<sub>4</sub>.

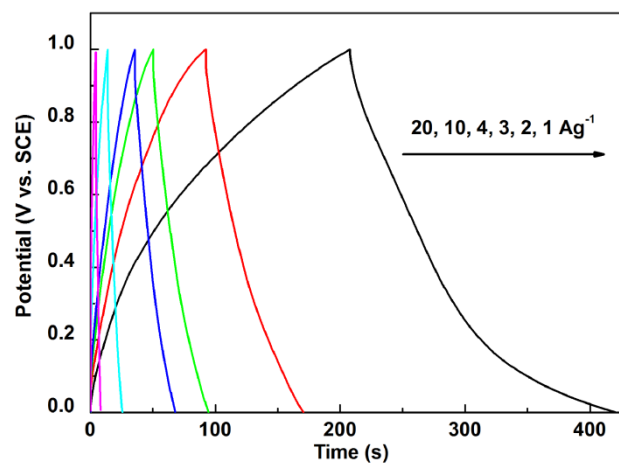

**Fig. S3** Galvanostatic charge–discharge curves of CNTs@Mn-MOF with respect to current densities.

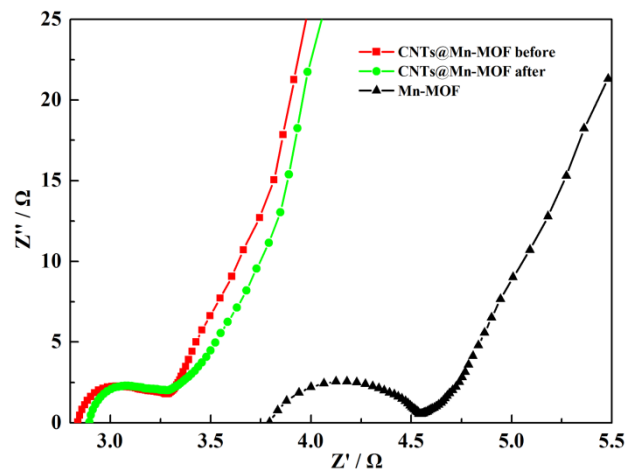

**Fig. S4** Nyquist plots for CNTs@Mn-MOF (before and after long-term cycling ) and Mn-MOF.

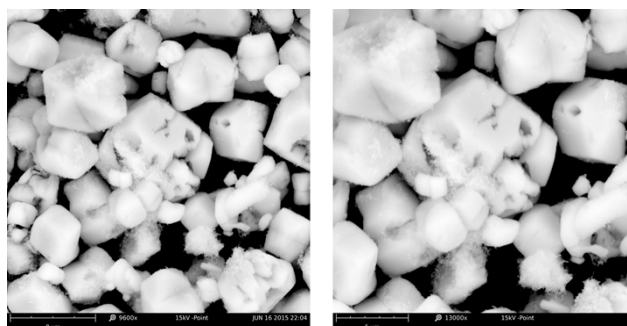

**Fig. S5** SEM images of the CNTs@Mn-MOF after long-term cycling at different magnification.
